# Supplementary material
Source: HighWire-hosted journal article supplement (http://molpharm.aspetjournals.org/highwire/filestream/76908/field_highwire_adjunct_files/0/SI_fig_1.pdf)
Supplement: SI_fig_1.pdf [file SI_fig_1.pdf]

**Glycine hinges with opposing actions at the acetylcholine receptor-channel transmitter binding site**

Prasad Purohit and Anthony Auerbach  
 Department of Physiology and Biophysics, SUNY at Buffalo, Buffalo 14214, USA  
**Molecular Pharmacology**

Supplemental Figure 1

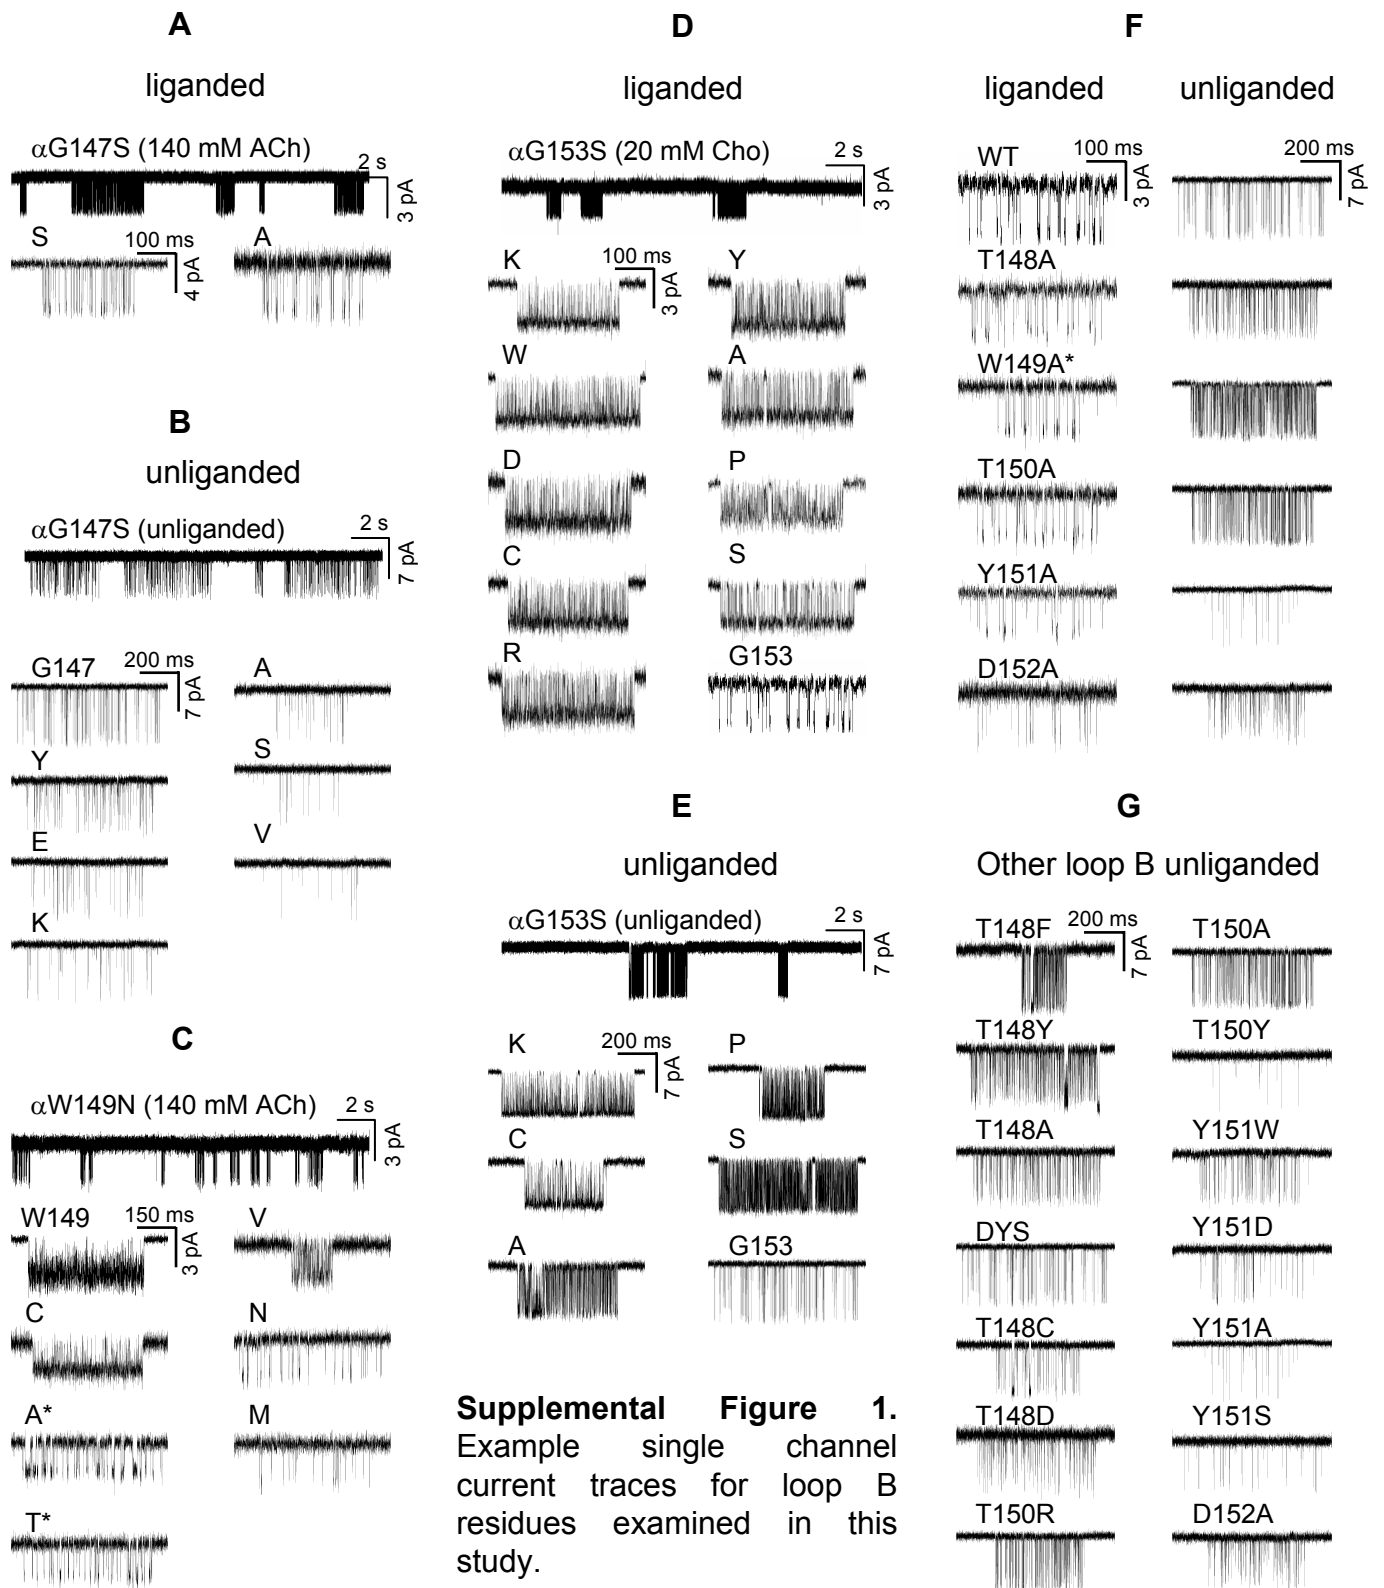

**Supplemental Figure 1.** Example single channel current traces for loop B residues examined in this study.
